# Supplementary material for: Antigenic Determinants of SARS-CoV-2-Specific CD4+ T Cell Lines Reveals M Protein-Driven Dysregulation of Interferon Signaling
Source: Front Immunol. 2022 Jun 30;13:883159. doi: 10.3389/fimmu.2022.883159 (PMC9279651; doi:10.3389/fimmu.2022.883159)
Supplement: Supplementary file 2 [file Table_1.xlsx]

## Sheet: Sheet1
SARS-CoV-2 surface glycoprotein (S) - complete sequence								SARS-CoV-2 membrance glycoprotein (M) - complete sequence								Human betaherpesvirus 5 - CMV
Protein ID	Peptide Index	Protein name	Start AA	End AA	Peptide	Length		Protein ID	Peptide Index	Protein name	Start AA	End AA	Peptide Sequence	Length		Protein ID	Peptide Index	Protein name	Start AA	End AA	Peptide	Length
YP_009724390.1	1	S protein	1	15	MFVFLVLLPLVSSQC	15		QHD43419.1	1	M protein	1	15	MADSNGTITVEELKK	15		Q6SW67	1	Envelope glycoprotein H	291	303	SYLKDSDFLDAAL	13
YP_009724390.1	2	S protein	6	20	VLLPLVSSQCVNLTT	15		QHD43419.2	2	M protein	5	19	NGTITVEELKKLLEQ	15		Q6SW59	2	65 kDa phosphoprotein	510	522	YQEFFWDANDIYR	13
YP_009724390.1	3	S protein	11	25	VSSQCVNLTTRTQLP	15		QHD43419.3	3	M protein	9	23	TVEELKKLLEQWNLV	15		Q6SW59	3	65 kDa phosphoprotein	512	524	EFFWDANDIYRIF	13
YP_009724390.1	4	S protein	16	30	VNLTTRTQLPPAYTN	15		QHD43419.4	4	M protein	13	27	LKKLLEQWNLVIGFL	15		Q6SW59	4	65 kDa phosphoprotein	59	71	SQYTPDSTPCHRG	13
YP_009724390.1	5	S protein	21	35	RTQLPPAYTNSFTRG	15		QHD43419.5	5	M protein	17	31	LEQWNLVIGFLFLTW	15		Q6SW59	5	65 kDa phosphoprotein	283	295	KPGKISHIMLDVA	13
YP_009724390.1	6	S protein	26	40	PAYTNSFTRGVYYPD	15		QHD43419.6	6	M protein	21	35	NLVIGFLFLTWICLL	15		Q6SW59	6	65 kDa phosphoprotein	367	379	PTFTSQYRIQGKL	13
YP_009724390.1	7	S protein	31	45	SFTRGVYYPDKVFRS	15		QHD43419.7	7	M protein	25	39	GFLFLTWICLLQFAY	15		Q6SW59	7	65 kDa phosphoprotein	116	129	LPLKMLNIPSINVH	14
YP_009724390.1	8	S protein	36	50	VYYPDKVFRSSVLHS	15		QHD43419.8	8	M protein	29	43	LTWICLLQFAYANRN	15		F5HCM1	8	55 kDa immediate-early protein 1	162	175	DKREMWMACIKELH	14
YP_009724390.1	9	S protein	41	55	KVFRSSVLHSTQDLF	15		QHD43419.9	9	M protein	33	47	CLLQFAYANRNRFLY	15		Q6SW59	9	65 kDa phosphoprotein	288	301	SHIMLDVAFTSHEH	14
YP_009724390.1	10	S protein	46	60	SVLHSTQDLFLPFFS	15		QHD43419.10	10	M protein	37	51	FAYANRNRFLYIIKL	15		F5HDQ6	10	Major DNA-binding protein	674	687	PYAVAFQPLLAYAY	14
YP_009724390.1	11	S protein	51	65	TQDLFLPFFSNVTWF	15		QHD43419.11	11	M protein	41	55	NRNRFLYIIKLIFLW	15		F5HCM1	11	55 kDa immediate-early protein 1	101	115	KEHMLKKYTQTEEKF	15
YP_009724390.1	12	S protein	56	70	LPFFSNVTWFHAIHV	15		QHD43419.12	12	M protein	45	59	FLYIIKLIFLWLLWP	15		F5HB53	12	Envelope glycoprotein B	190	204	SRVIAGTVFVAYHRD	15
YP_009724390.1	13	S protein	61	75	NVTWFHAIHVSGTNG	15		QHD43419.13	13	M protein	49	63	IKLIFLWLLWPVTLA	15		F5HB53	13	Envelope glycoprotein B	250	264	CMVTITTARSKYPYH	15
YP_009724390.1	14	S protein	66	80	HAIHVSGTNGTKRFD	15		QHD43419.14	14	M protein	53	67	FLWLLWPVTLACFVL	15		F5HB53	14	Envelope glycoprotein B	420	434	VFETTGGLVVFWQGI	15
YP_009724390.1	15	S protein	71	85	SGTNGTKRFDNPVLP	15		QHD43419.15	15	M protein	57	71	LWPVTLACFVLAAVY	15		Q6SW59	15	65 kDa phosphoprotein	221	235	DQYVKVYLESFCEDV	15
YP_009724390.1	16	S protein	76	90	TKRFDNPVLPFNDGV	15		QHD43419.16	16	M protein	61	75	TLACFVLAAVYRINW	15		Q6SW59	16	65 kDa phosphoprotein	285	299	GKISHIMLDVAFTSH	15
YP_009724390.1	17	S protein	81	95	NPVLPFNDGVYFAST	15		QHD43419.17	17	M protein	65	79	FVLAAVYRINWITGG	15		Q6SW59	17	65 kDa phosphoprotein	365	379	EHPTFTSQYRIQGKL	15
YP_009724390.2	18	S protein	86	100	FNDGVYFASTEKSNI	15		QHD43419.18	18	M protein	69	83	AVYRINWITGGIAIA	15		Q6SW59	18	65 kDa phosphoprotein	505	519	GQNLKYQEFFWDAND	15
YP_009724390.3	19	S protein	91	105	YFASTEKSNIIRGWI	15		QHD43419.19	19	M protein	73	87	INWITGGIAIAMACL	15		Q6SW59	19	65 kDa phosphoprotein	509	523	KYQEFFWDANDIYRI	15
YP_009724390.4	20	S protein	96	110	EKSNIIRGWIFGTTL	15		QHD43419.20	20	M protein	77	91	TGGIAIAMACLVGLM	15		Q6SW59	20	65 kDa phosphoprotein	281	295	IIKPGKISHIMLDVA	15
YP_009724390.5	21	S protein	101	115	IRGWIFGTTLDSKTQ	15		QHD43419.21	21	M protein	81	95	AIAMACLVGLMWLSY	15		Q6SW59	21	65 kDa phosphoprotein	16	30	GPISGHVLKAVFSRG	15
YP_009724390.6	22	S protein	106	120	FGTTLDSKTQSLLIV	15		QHD43419.22	22	M protein	85	99	ACLVGLMWLSYFIAS	15		Q6SW59	22	65 kDa phosphoprotein	41	55	LLQTGIHVRVSQPSL	15
YP_009724390.7	23	S protein	111	125	DSKTQSLLIVNNATN	15		QHD43419.23	23	M protein	89	103	GLMWLSYFIASFRLF	15		Q6SW59	23	65 kDa phosphoprotein	111	125	IYVYALPLKMLNIPS	15
YP_009724390.8	24	S protein	116	130	SLLIVNNATNVVIKV	15		QHD43419.24	24	M protein	93	107	LSYFIASFRLFARTR	15		Q6SW59	24	65 kDa phosphoprotein	116	130	LPLKMLNIPSINVHH	15
YP_009724390.9	25	S protein	121	135	NNATNVVIKVCEFQF	15		QHD43419.25	25	M protein	97	111	IASFRLFARTRSMWS	15		Q6SW59	25	65 kDa phosphoprotein	191	205	KDVALRHVVCAHELV	15
YP_009724390.10	26	S protein	126	140	VVIKVCEFQFCNDPF	15		QHD43419.26	26	M protein	101	115	RLFARTRSMWSFNPE	15		Q6SW59	26	65 kDa phosphoprotein	196	210	RHVVCAHELVCSMEN	15
YP_009724390.11	27	S protein	131	145	CEFQFCNDPFLGVYY	15		QHD43419.27	27	M protein	105	119	RTRSMWSFNPETNIL	15		Q6SW59	27	65 kDa phosphoprotein	206	220	CSMENTRATKMQVIG	15
YP_009724390.12	28	S protein	136	150	CNDPFLGVYYHKNNK	15		QHD43419.28	28	M protein	109	123	MWSFNPETNILLNVP	15		Q6SW59	28	65 kDa phosphoprotein	211	225	TRATKMQVIGDQYVK	15
YP_009724390.13	29	S protein	141	155	LGVYYHKNNKSWMES	15		QHD43419.29	29	M protein	113	127	NPETNILLNVPLHGT	15		Q6SW59	29	65 kDa phosphoprotein	216	230	MQVIGDQYVKVYLES	15
YP_009724390.14	30	S protein	146	160	HKNNKSWMESEFRVY	15		QHD43419.30	30	M protein	117	131	NILLNVPLHGTILTR	15		Q6SW59	30	65 kDa phosphoprotein	226	240	VYLESFCEDVPSGKL	15
YP_009724390.15	31	S protein	151	165	SWMESEFRVYSSANN	15		QHD43419.31	31	M protein	121	135	NVPLHGTILTRPLLE	15		Q6SW59	31	65 kDa phosphoprotein	231	245	FCEDVPSGKLFMHVT	15
YP_009724390.16	32	S protein	156	170	EFRVYSSANNCTFEY	15		QHD43419.32	32	M protein	125	139	HGTILTRPLLESELV	15		Q6SW59	32	65 kDa phosphoprotein	246	260	LGSDVEEDLTMTRNP	15
YP_009724390.17	33	S protein	161	175	SSANNCTFEYVSQPF	15		QHD43419.33	33	M protein	129	143	LTRPLLESELVIGAV	15		Q6SW59	33	65 kDa phosphoprotein	251	265	EEDLTMTRNPQPFMR	15
YP_009724390.18	34	S protein	166	180	CTFEYVSQPFLMDLE	15		QHD43419.34	34	M protein	133	147	LLESELVIGAVILRG	15		Q6SW59	34	65 kDa phosphoprotein	261	275	QPFMRPHERNGFTVL	15
YP_009724390.19	35	S protein	171	185	VSQPFLMDLEGKQGN	15		QHD43419.35	35	M protein	137	151	ELVIGAVILRGHLRI	15		Q6SW59	35	65 kDa phosphoprotein	286	300	KISHIMLDVAFTSHE	15
YP_009724390.20	36	S protein	176	190	LMDLEGKQGNFKNLR	15		QHD43419.36	36	M protein	141	155	GAVILRGHLRIAGHH	15		Q6SW59	36	65 kDa phosphoprotein	291	305	MLDVAFTSHEHFGLL	15
YP_009724390.21	37	S protein	181	195	GKQGNFKNLREFVFK	15		QHD43419.37	37	M protein	145	159	LRGHLRIAGHHLGRC	15		Q6SW59	37	65 kDa phosphoprotein	296	310	FTSHEHFGLLCPKSI	15
YP_009724390.22	38	S protein	186	200	FKNLREFVFKNIDGY	15		QHD43419.38	38	M protein	149	163	LRIAGHHLGRCDIKD	15		Q6SW59	38	65 kDa phosphoprotein	361	375	PQYSEHPTFTSQYRI	15
YP_009724390.23	39	S protein	191	205	EFVFKNIDGYFKIYS	15		QHD43419.39	39	M protein	153	167	GHHLGRCDIKDLPKE	15		Q6SW59	39	65 kDa phosphoprotein	371	385	SQYRIQGKLEYRHTW	15
YP_009724390.24	40	S protein	196	210	NIDGYFKIYSKHTPI	15		QHD43419.40	40	M protein	157	171	GRCDIKDLPKEITVA	15		Q6SW59	40	65 kDa phosphoprotein	381	395	YRHTWDRHDEGAAQG	15
YP_009724390.25	41	S protein	201	215	FKIYSKHTPINLVRD	15		QHD43419.41	41	M protein	161	175	IKDLPKEITVATSRT	15		Q6SW59	41	65 kDa phosphoprotein	476	490	IHNPAVFTWPPWQAG	15
YP_009724390.26	42	S protein	206	220	KHTPINLVRDLPQGF	15		QHD43419.42	42	M protein	165	179	PKEITVATSRTLSYY	15		Q6SW59	42	65 kDa phosphoprotein	486	500	PWQAGILARNLVPMV	15
YP_009724390.27	43	S protein	211	225	NLVRDLPQGFSALEP	15		QHD43419.43	43	M protein	169	183	TVATSRTLSYYKLGA	15		Q6SW59	43	65 kDa phosphoprotein	501	515	ATVQGQNLKYQEFFW	15
YP_009724390.28	44	S protein	216	230	LPQGFSALEPLVDLP	15		QHD43419.44	44	M protein	173	187	SRTLSYYKLGASQRV	15		Q6SW59	44	65 kDa phosphoprotein	506	520	QNLKYQEFFWDANDI	15
YP_009724390.29	45	S protein	221	235	SALEPLVDLPIGINI	15		QHD43419.45	45	M protein	177	191	SYYKLGASQRVAGDS	15		Q6SW59	45	65 kDa phosphoprotein	511	525	QEFFWDANDIYRIFA	15
YP_009724390.30	46	S protein	226	240	LVDLPIGINITRFQT	15		QHD43419.46	46	M protein	181	195	LGASQRVAGDSGFAA	15		Q6SW59	46	65 kDa phosphoprotein	526	540	ELEGVWQPAAQPKRR	15
YP_009724390.31	47	S protein	231	245	IGINITRFQTLLALH	15		QHD43419.47	47	M protein	185	199	QRVAGDSGFAAYSRY	15		Q6SW59	47	65 kDa phosphoprotein	326	340	IFLEVQAIRETVELR	15
YP_009724390.32	48	S protein	236	250	TRFQTLLALHRSYLT	15		QHD43419.48	48	M protein	189	203	GDSGFAAYSRYRIGN	15		Q6SW59	48	65 kDa phosphoprotein	485	499	PPWQAGILARNLVPM	15
YP_009724390.33	49	S protein	241	255	LLALHRSYLTPGDSS	15		QHD43419.49	49	M protein	193	207	FAAYSRYRIGNYKLN	15		Q6SW59	49	65 kDa phosphoprotein	234	248	DVPSGKLFMHVTLGS	15
YP_009724390.34	50	S protein	246	260	RSYLTPGDSSSGWTA	15		QHD43419.50	50	M protein	197	211	SRYRIGNYKLNTDHS	15		Q6SW59	50	65 kDa phosphoprotein	239	253	KLFMHVTLGSDVEED	15
YP_009724390.35	51	S protein	251	265	PGDSSSGWTAGAAAY	15		QHD43419.51	51	M protein	201	215	IGNYKLNTDHSSSSD	15		Q6SW59	51	65 kDa phosphoprotein	249	263	DVEEDLTMTRNPQPF	15
YP_009724390.36	52	S protein	256	270	SGWTAGAAAYYVGYL	15		QHD43419.52	52	M protein	205	219	KLNTDHSSSSDNIAL	15		Q6SW59	52	65 kDa phosphoprotein	294	308	VAFTSHEHFGLLCPK	15
YP_009724390.37	53	S protein	261	275	GAAAYYVGYLQPRTF	15		QHD43419.53	53	M protein	208	222	TDHSSSSDNIALLVQ	15		Q6SW59	53	65 kDa phosphoprotein	364	378	SEHPTFTSQYRIQGK	15
YP_009724390.38	54	S protein	266	280	YVGYLQPRTFLLKYN	15										Q6SW59	54	65 kDa phosphoprotein	379	393	LEYRHTWDRHDEGAA	15
YP_009724390.39	55	S protein	271	285	QPRTFLLKYNENGTI	15										Q6SW59	55	65 kDa phosphoprotein	117	131	PLKMLNIPSINVHHY	15
YP_009724390.40	56	S protein	276	290	LLKYNENGTITDAVD	15										Q6SW59	56	65 kDa phosphoprotein	225	239	KVYLESFCEDVPSGK	15
YP_009724390.41	57	S protein	281	295	ENGTITDAVDCALDP	15										Q6SW59	57	65 kDa phosphoprotein	245	259	TLGSDVEEDLTMTRN	15
YP_009724390.42	58	S protein	286	300	TDAVDCALDPLSETK	15										Q6SW59	58	65 kDa phosphoprotein	429	443	ASTSAGRKRKSASSA	15
YP_009724390.43	59	S protein	291	305	CALDPLSETKCTLKS	15										Q6SW59	59	65 kDa phosphoprotein	445	459	ACTSGVMTRGRLKAE	15
YP_009724390.44	60	S protein	296	310	LSETKCTLKSFTVEK	15										Q6SW59	60	65 kDa phosphoprotein	489	503	AGILARNLVPMVATV	15
YP_009724390.45	61	S protein	301	315	CTLKSFTVEKGIYQT	15										Q6SW59	61	65 kDa phosphoprotein	177	191	EPDVYYTSAFVFPTK	15
YP_009724390.46	62	S protein	306	320	FTVEKGIYQTSNFRV	15										Q6SW59	62	65 kDa phosphoprotein	166	180	LAWTRQQNQWKEPDV	15
YP_009724390.47	63	S protein	311	325	GIYQTSNFRVQPTES	15										Q6SW59	63	65 kDa phosphoprotein	510	524	YQEFFWDANDIYRIF	15
YP_009724390.48	64	S protein	316	330	SNFRVQPTESIVRFP	15										Q6SW59	64	65 kDa phosphoprotein	250	264	VEEDLTMTRNPQPFM	15
YP_009724390.49	65	S protein	321	335	QPTESIVRFPNITNL	15										Q6SW59	65	65 kDa phosphoprotein	370	384	TSQYRIQGKLEYRHT	15
YP_009724390.50	66	S protein	326	340	IVRFPNITNLCPFGE	15										Q6SW59	66	65 kDa phosphoprotein	109	123	MSIYVYALPLKMLNI	15
YP_009724390.51	67	S protein	331	345	NITNLCPFGEVFNAT	15										Q6SW59	67	65 kDa phosphoprotein	180	194	VYYTSAFVFPTKDVA	15
YP_009724390.52	68	S protein	336	350	CPFGEVFNATRFASV	15										Q6SW59	68	65 kDa phosphoprotein	339	353	LRQYDPVAALFFFDI	15
YP_009724390.53	69	S protein	341	355	VFNATRFASVYAWNR	15										Q6SW59	69	65 kDa phosphoprotein	366	380	HPTFTSQYRIQGKLE	15
YP_009724390.54	70	S protein	346	360	RFASVYAWNRKRISN	15										Q6SW59	70	65 kDa phosphoprotein	39	53	TRLLQTGIHVRVSQP	15
YP_009724390.55	71	S protein	351	365	YAWNRKRISNCVADY	15										Q6SW59	71	65 kDa phosphoprotein	269	283	RNGFTVLCPKNMIIK	15
YP_009724390.56	72	S protein	356	370	KRISNCVADYSVLYN	15										Q6SW59	72	65 kDa phosphoprotein	217	231	QVIGDQYVKVYLESF	15
YP_009724390.57	73	S protein	361	375	CVADYSVLYNSASFS	15										Q6SW59	73	65 kDa phosphoprotein	513	527	FFWDANDIYRIFAEL	15
YP_009724390.58	74	S protein	366	380	SVLYNSASFSTFKCY	15										Q6SW59	74	65 kDa phosphoprotein	57	71	LVSQYTPDSTPCHRG	15
YP_009724390.59	75	S protein	371	385	SASFSTFKCYGVSPT	15										Q6SW59	75	65 kDa phosphoprotein	356	370	LLQRGPQYSEHPTFT	15
YP_009724390.60	76	S protein	376	390	TFKCYGVSPTKLNDL	15										Q6SW59	76	65 kDa phosphoprotein	37	51	HETRLLQTGIHVRVS	15
YP_009724390.61	77	S protein	381	395	GVSPTKLNDLCFTNV	15										Q6SW59	77	65 kDa phosphoprotein	113	127	VYALPLKMLNIPSIN	15
YP_009724390.62	78	S protein	386	400	KLNDLCFTNVYADSF	15										Q6SW59	78	65 kDa phosphoprotein	193	207	VALRHVVCAHELVCS	15
YP_009724390.63	79	S protein	391	405	CFTNVYADSFVIRGD	15										Q6SW59	79	65 kDa phosphoprotein	289	303	HIMLDVAFTSHEHFG	15
YP_009724390.64	80	S protein	396	410	YADSFVIRGDEVRQI	15										Q6SW59	80	65 kDa phosphoprotein	369	383	FTSQYRIQGKLEYRH	15
YP_009724390.65	81	S protein	401	415	VIRGDEVRQIAPGQT	15										Q6SW59	81	65 kDa phosphoprotein	373	387	YRIQGKLEYRHTWDR	15
YP_009724390.66	82	S protein	406	420	EVRQIAPGQTGKIAD	15										Q6SW59	82	65 kDa phosphoprotein	493	507	ARNLVPMVATVQGQN	15
YP_009724390.67	83	S protein	411	425	APGQTGKIADYNYKL	15										Q6SW59	83	65 kDa phosphoprotein	517	531	ANDIYRIFAELEGVW	15
YP_009724390.68	84	S protein	416	430	GKIADYNYKLPDDFT	15										Q6SW59	84	65 kDa phosphoprotein	105	119	ALPLKMLNIPSINVH	15
YP_009724390.69	85	S protein	421	435	YNYKLPDDFTGCVIA	15										Q6SW59	85	65 kDa phosphoprotein	169	183	TRQQNQWKEPDVYYT	15
YP_009724390.70	86	S protein	426	440	PDDFTGCVIAWNSNN	15										Q6SW59	86	65 kDa phosphoprotein	413	427	TERKTPRVTGGGAMA	15
YP_009724390.71	87	S protein	431	445	GCVIAWNSNNLDSKV	15										F5HCM1	87	55 kDa immediate-early protein 1	211	225	NIEFFTKNSAFPKTT	15
YP_009724390.72	88	S protein	436	450	WNSNNLDSKVGGNYN	15										F5HCM1	88	55 kDa immediate-early protein 1	91	105	VRVDMVRHRIKEHML	15
YP_009724390.73	89	S protein	441	455	LDSKVGGNYNYLYRL	15										Q6SW29	89	Viral transcription factor IE2	356	370	TRRGRVKIDEVSRMF	15
YP_009724390.74	90	S protein	446	460	GGNYNYLYRLFRKSN	15										F5HCM1	90	55 kDa immediate-early protein 1	86	100	VKQIKVRVDMVRHRI	15
YP_009724390.75	91	S protein	451	465	YLYRLFRKSNLKPFE	15										F5HCM1	91	55 kDa immediate-early protein 1	96	110	VRHRIKEHMLKKYTQ	15
YP_009724390.76	92	S protein	456	470	FRKSNLKPFERDIST	15										F5HCM1	92	55 kDa immediate-early protein 1	429	443	EQSDEEEEEGAQEER	15
YP_009724390.77	93	S protein	461	475	LKPFERDISTEIYQA	15										F5HCM1	93	55 kDa immediate-early protein 1	449	463	VKSEPVSEIEEVAPE	15
YP_009724390.78	94	S protein	466	480	RDISTEIYQAGSTPC	15										F5HCM1	94	55 kDa immediate-early protein 1	453	467	PVSEIEEVAPEEEED	15
YP_009724390.79	95	S protein	471	485	EIYQAGSTPCNGVEG	15										Q6SW29	95	Viral transcription factor IE2	86	100	GDILAQAVNHAGIDS	15
YP_009724390.80	96	S protein	476	490	GSTPCNGVEGFNCYF	15										Q6SW29	96	Viral transcription factor IE2	151	165	KTTRPFKVIIKPPVP	15
YP_009724390.81	97	S protein	481	495	NGVEGFNCYFPLQSY	15										Q6SW29	97	Viral transcription factor IE2	156	170	FKVIIKPPVPPAPIM	15
YP_009724390.82	98	S protein	486	500	FNCYFPLQSYGFQPT	15										Q6SW29	98	Viral transcription factor IE2	181	195	PEPDFTIQYRNKIID	15
YP_009724390.83	99	S protein	491	505	PLQSYGFQPTNGVGY	15										Q6SW29	99	Viral transcription factor IE2	383	397	PFTIPSMHQVLDEAI	15
YP_009724390.84	100	S protein	496	510	GFQPTNGVGYQPYRV	15										Q6SW29	100	Viral transcription factor IE2	513	527	LMQKFPKQVMVRIFS	15
YP_009724390.85	101	S protein	501	515	NGVGYQPYRVVVLSF	15										Q6SW29	101	Viral transcription factor IE2	523	537	VRIFSTNQGGFMLPI	15
YP_009724390.86	102	S protein	506	520	QPYRVVVLSFELLHA	15										Q6SW29	102	Viral transcription factor IE2	558	572	PEDLDTLSLAIEAAI	15
YP_009724390.87	103	S protein	511	525	VVLSFELLHAPATVC	15										Q6SW29	103	Viral transcription factor IE2	563	577	TLSLAIEAAIQDLRN	15
YP_009724390.88	104	S protein	516	530	ELLHAPATVCGPKKS	15										Q6SW29	104	Viral transcription factor IE2	388	402	SMHQVLDEAIKACKT	15
YP_009724390.89	105	S protein	521	535	PATVCGPKKSTNLVK	15										Q6SW29	105	Viral transcription factor IE2	408	422	KGIQIIYTRNHEVKS	15
YP_009724390.90	106	S protein	526	540	GPKKSTNLVKNKCVN	15										Q6SW29	106	Viral transcription factor IE2	438	452	ALSTPFLMEHTMPVT	15
YP_009724390.91	107	S protein	531	545	TNLVKNKCVNFNFNG	15										Q6SW29	107	Viral transcription factor IE2	443	457	FLMEHTMPVTHPPEV	15
YP_009724390.92	108	S protein	536	550	NKCVNFNFNGLTGTG	15										F5HCM1	108	55 kDa immediate-early protein 1	126	140	LQNALDILDKVHEPF	15
YP_009724390.93	109	S protein	541	555	FNFNGLTGTGVLTES	15										F5HCM1	109	55 kDa immediate-early protein 1	161	175	EDKREMWMACIKELH	15
YP_009724390.94	110	S protein	546	560	LTGTGVLTESNKKFL	15										F5HCM1	110	55 kDa immediate-early protein 1	266	280	THIDHIFMDILTTCV	15
YP_009724390.95	111	S protein	551	565	VLTESNKKFLPFQQF	15										F5HCM1	111	55 kDa immediate-early protein 1	316	330	VLEETSVMLAKRPLI	15
YP_009724390.96	112	S protein	556	570	NKKFLPFQQFGRDIA	15										F5HCM1	112	55 kDa immediate-early protein 1	331	345	TKPEVISVMKRRIEE	15
YP_009724390.97	113	S protein	561	575	PFQQFGRDIADTTDA	15										F5HCM1	113	55 kDa immediate-early protein 1	341	355	RRIEEICMKVFAQYI	15
YP_009724390.98	114	S protein	566	580	GRDIADTTDAVRDPQ	15										Q6SW59	114	65 kDa phosphoprotein	25	39	AVFSRGDTPVLPHET	15
YP_009724390.99	115	S protein	571	585	DTTDAVRDPQTLEIL	15										Q6SW59	115	65 kDa phosphoprotein	17	31	PISGHVLKAVFSRGD	15
YP_009724390.100	116	S protein	576	590	VRDPQTLEILDITPC	15										Q6SW59	116	65 kDa phosphoprotein	11	25	HVLKAVFSRGDTPVL	15
YP_009724390.101	117	S protein	581	595	TLEILDITPCSFGGV	15										Q6SW59	117	65 kDa phosphoprotein	45	59	GIHVRVSQPSLILVS	15
YP_009724390.102	118	S protein	586	600	DITPCSFGGVSVITP	15										Q6SW59	118	65 kDa phosphoprotein	101	115	SICPSQEPMSIYVYA	15
YP_009724390.103	119	S protein	591	605	SFGGVSVITPGTNTS	15										Q6SW59	119	65 kDa phosphoprotein	105	119	SQEPMSIYVYALPLK	15
YP_009724390.104	120	S protein	596	610	SVITPGTNTSNQVAV	15										Q6SW59	120	65 kDa phosphoprotein	121	135	LNIPSINVHHYPSAA	15
YP_009724390.105	121	S protein	601	615	GTNTSNQVAVLYQDV	15										Q6SW59	121	65 kDa phosphoprotein	149	163	IHASGKQMWQARLTV	15
YP_009724390.106	122	S protein	606	620	NQVAVLYQDVNCTEV	15										Q6SW59	122	65 kDa phosphoprotein	153	167	GKQMWQARLTVSGLA	15
YP_009724390.107	123	S protein	611	625	LYQDVNCTEVPVAIH	15										Q6SW59	123	65 kDa phosphoprotein	209	223	ENTRATKMQVIGDQY	15
YP_009724390.108	124	S protein	616	630	NCTEVPVAIHADQLT	15										Q6SW59	124	65 kDa phosphoprotein	213	227	ATKMQVIGDQYVKVY	15
YP_009724390.109	125	S protein	621	635	PVAIHADQLTPTWRV	15										Q6SW59	125	65 kDa phosphoprotein	265	279	RPHERNGFTVLCPKN	15
YP_009724390.110	126	S protein	626	640	ADQLTPTWRVYSTGS	15										Q6SW59	126	65 kDa phosphoprotein	393	407	AQGDDDVWTSGSDSD	15
YP_009724390.111	127	S protein	631	645	PTWRVYSTGSNVFQT	15										Q6SW59	127	65 kDa phosphoprotein	441	455	SSATACTSGVMTRGR	15
YP_009724390.112	128	S protein	636	650	YSTGSNVFQTRAGCL	15										Q6SW59	128	65 kDa phosphoprotein	521	535	YRIFAELEGVWQPAA	15
YP_009724390.113	129	S protein	641	655	NVFQTRAGCLIGAEH	15										Q6SW59	129	65 kDa phosphoprotein	525	539	AELEGVWQPAAQPKR	15
YP_009724390.114	130	S protein	646	660	RAGCLIGAEHVNNSY	15										Q6SW59	130	65 kDa phosphoprotein	507	521	NLKYQEFFWDANDIY	15
YP_009724390.115	131	S protein	651	665	IGAEHVNNSYECDIP	15										Q6SW59	131	65 kDa phosphoprotein	417	431	TPRVTGGGAMAGAST	15
YP_009724390.116	132	S protein	656	670	VNNSYECDIPIGAGI	15										Q6SW59	132	65 kDa phosphoprotein	361	376	PQYSEHPTFTSQYRIQ	16
YP_009724390.117	133	S protein	661	675	ECDIPIGAGICASYQ	15										Q6SW59	133	65 kDa phosphoprotein	369	384	FTSQYRIQGKLEYRHT	16
YP_009724390.118	134	S protein	666	680	IGAGICASYQTQTNS	15										Q6SW59	134	65 kDa phosphoprotein	485	500	PPWQAGILARNLVPMV	16
YP_009724390.119	135	S protein	671	685	CASYQTQTNSPRRAR	15										Q6SW59	135	65 kDa phosphoprotein	509	524	KYQEFFWDANDIYRIF	16
YP_009724390.120	136	S protein	676	690	TQTNSPRRARSVASQ	15										Q6SW59	136	65 kDa phosphoprotein	360	375	GPQYSEHPTFTSQYRI	16
YP_009724390.121	137	S protein	681	695	PRRARSVASQSIIAY	15										Q6SW59	137	65 kDa phosphoprotein	469	484	DEDSDNEIHNPAVFTW	16
YP_009724390.122	138	S protein	686	700	SVASQSIIAYTMSLG	15										Q6SW59	138	65 kDa phosphoprotein	340	355	RQYDPVAALFFFDIDL	16
YP_009724390.123	139	S protein	691	705	SIIAYTMSLGAENSV	15										F5HB53	139	Envelope glycoprotein B	178	194	HINSHSQCYSSYSRVIA	17
YP_009724390.124	140	S protein	696	710	TMSLGAENSVAYSNN	15										Q6SW59	140	65 kDa phosphoprotein	283	299	KPGKISHIMLDVAFTSH	17
YP_009724390.125	141	S protein	701	715	AENSVAYSNNSIAIP	15										Q6SW67	141	Envelope glycoprotein H	34	50	LDKAFHLLLNTYGRPIR	17
YP_009724390.126	142	S protein	706	720	AYSNNSIAIPTNFTI	15										Q6SW67	142	Envelope glycoprotein H	34	51	LDPHAFHLLLNTYGRPIR	18
YP_009724390.127	143	S protein	711	725	SIAIPTNFTISVTTE	15										Q6SW59	143	65 kDa phosphoprotein	41	58	LLQTGIHVRVSQPSLILV	18
YP_009724390.128	144	S protein	716	730	TNFTISVTTEILPVS	15										F5HCM1	144	55 kDa immediate-early protein 1	0	0	HDVSKGDDNKLGGALQAKA	19
YP_009724390.129	145	S protein	721	735	SVTTEILPVSMTKTS	15										F5HCM1	145	55 kDa immediate-early protein 1	0	0	ALQAKARDKKDELRRKMMY	19
YP_009724390.130	146	S protein	726	740	ILPVSMTKTSVDCTM	15										F5HCM1	146	55 kDa immediate-early protein 1	110	128	QTEEKFTGAFNMMGGCLQN	19
YP_009724390.131	147	S protein	731	745	MTKTSVDCTMYICGD	15										F5HCM1	147	55 kDa immediate-early protein 1	383	401	AIVAYTLATAGVSSSDSLV	19
YP_009724390.132	148	S protein	736	750	VDCTMYICGDSTECS	15										F5HCM1	148	55 kDa immediate-early protein 1	383	401	AIVAYTLATAGASSSDSLV	19
YP_009724390.133	149	S protein	741	755	YICGDSTECSNLLLQ	15										F5HCM1	149	55 kDa immediate-early protein 1	149	167	TMQSMYENYIVPEDKREMW	19
YP_009724390.134	150	S protein	746	760	STECSNLLLQYGSFC	15										F5HCM1	150	55 kDa immediate-early protein 1	201	219	RRKMMYMCYRNIEFFTKNS	19
YP_009724390.135	151	S protein	751	765	NLLLQYGSFCTQLNR	15										F5HCM1	151	55 kDa immediate-early protein 1	214	232	FFTKNSAFPKTTNGCSQAM	19
YP_009724390.136	152	S protein	756	770	YGSFCTQLNRALTGI	15										F5HCM1	152	55 kDa immediate-early protein 1	279	297	CVETMCNEYKVTSDACMMT	19
YP_009724390.137	153	S protein	761	775	TQLNRALTGIAVEQD	15										F5HCM1	153	55 kDa immediate-early protein 1	0	0	DACMMTMYGGASLLSEFCR	19
YP_009724390.138	154	S protein	766	780	ALTGIAVEQDKNTQE	15										F5HGT1	154	Major capsid protein	493	511	RRIPHFYRVRREVPRTVNE	19
YP_009724390.139	155	S protein	771	785	AVEQDKNTQEVFAQV	15										F5HGT1	155	Major capsid protein	1181	1199	MDVNYFKIPNNPRGRASCM	19
YP_009724390.140	156	S protein	776	790	KNTQEVFAQVKQIYK	15										Q6SW67	156	Envelope glycoprotein H	284	302	KAQLNRHSYLKDSDFLDAA	19
YP_009724390.141	157	S protein	781	795	VFAQVKQIYKTPPIK	15										Q6SW67	157	Envelope glycoprotein H	324	342	DVLKSGRCQMLDRRTVEMA	19
YP_009724390.142	158	S protein	786	800	KQIYKTPPIKDFGGF	15										Q6SW67	158	Envelope glycoprotein H	283	301	KDQLNRHSYLKDPDFLDAA	19
YP_009724390.143	159	S protein	791	805	TPPIKDFGGFNFSQI	15										Q6SW67	159	Envelope glycoprotein H	284	302	KTQLNRHSYLKDSDFLDAA	19
YP_009724390.144	160	S protein	796	810	DFGGFNFSQILPDPS	15										Q6SW59	160	65 kDa phosphoprotein	347	365	ALFFFDIDLLLQRGPQYSE	19
YP_009724390.145	161	S protein	801	815	NFSQILPDPSKPSKR	15										F5HCM1	161	55 kDa immediate-early protein 1	265	283	LTHIDHIFMDILTTCVETM	19
YP_009724390.146	162	S protein	806	820	LPDPSKPSKRSFIED	15										Q6SW59	162	65 kDa phosphoprotein	245	263	TLGSDVEEDLTMTRNPQPF	19
YP_009724390.147	163	S protein	811	825	KPSKRSFIEDLLFNK	15										F5HCM1	163	55 kDa immediate-early protein 1	122	141	MGGCLQNALDILDKVHEPFE	20
YP_009724390.148	164	S protein	816	830	SFIEDLLFNKVTLAD	15										F5HCM1	164	55 kDa immediate-early protein 1	91	110	VRVDMVRHRIKEHMLKKYTQ	20
YP_009724390.149	165	S protein	821	835	LLFNKVTLADAGFIK	15										F5HCM1	165	55 kDa immediate-early protein 1	151	170	QSMYENYIVPEDKREMWMAC	20
YP_009724390.150	166	S protein	826	840	VTLADAGFIKQYGDC	15										Q6SW59	166	65 kDa phosphoprotein	211	230	TRATKMQVIGDQYVKVYLES	20
YP_009724390.151	167	S protein	831	845	AGFIKQYGDCLGDIA	15										Q6SW59	167	65 kDa phosphoprotein	239	258	KLFMHVTLGSDVEEDLTMTR	20
YP_009724390.152	168	S protein	836	850	QYGDCLGDIAARDLI	15										Q6SW59	168	65 kDa phosphoprotein	283	302	KPGKISHIMLDVAFTSHEHF	20
YP_009724390.153	169	S protein	841	855	LGDIAARDLICAQKF	15										Q6SW59	169	65 kDa phosphoprotein	142	161	LPVADAVIHASGKQMWQARL	20
YP_009724390.154	170	S protein	846	860	ARDLICAQKFNGLTV	15										Q6SW59	170	65 kDa phosphoprotein	403	422	GSDSDEELVTTERKTPRVTG	20
YP_009724390.155	171	S protein	851	865	CAQKFNGLTVLPPLL	15										Q6SW59	171	65 kDa phosphoprotein	541	560	RHRQDALPGPCIASTPKKHR	20
YP_009724390.156	172	S protein	856	870	NGLTVLPPLLTDEMI	15										F5HB53	172	Envelope glycoprotein B	158	177	MQLIPDDYSNTHSTRYVTVK	20
YP_009724390.157	173	S protein	861	875	LPPLLTDEMIAQYTS	15										Q6SW67	173	Envelope glycoprotein H	271	290	RQTEKHELLVLVKKAQLNRH	20
YP_009724390.158	174	S protein	866	880	TDEMIAQYTSALLAG	15										F5HCM1	174	55 kDa immediate-early protein 1	156	175	NYIVPEDKREMWMACIKELH	20
YP_009724390.159	175	S protein	871	885	AQYTSALLAGTITSG	15										F5HCM1	175	55 kDa immediate-early protein 1	96	115	VRHRIKEHMLKKYTQTEEKF	20
YP_009724390.160	176	S protein	876	890	ALLAGTITSGWTFGA	15										Q6SW59	176	65 kDa phosphoprotein	31	50	DTPVLPHETRLLQTGIHVRV	20
YP_009724390.161	177	S protein	881	895	TITSGWTFGAGAALQ	15										Q6SW59	177	65 kDa phosphoprotein	126	145	INVHHYPSAAERKHRHLPVA	20
YP_009724390.162	178	S protein	886	900	WTFGAGAALQIPFAM	15										Q6SW59	178	65 kDa phosphoprotein	221	240	DQYVKVYLESFCEDVPSGKL	20
YP_009724390.163	179	S protein	891	905	GAALQIPFAMQMAYR	15										Q6SW59	179	65 kDa phosphoprotein	256	275	MTRNPQPFMRPHERNGFTVL	20
YP_009724390.164	180	S protein	896	910	IPFAMQMAYRFNGIG	15										Q6SW59	180	65 kDa phosphoprotein	11	30	MISVLGPISGHVLKAVFSRG	20
YP_009724390.165	181	S protein	901	915	QMAYRFNGIGVTQNV	15										Q6SW59	181	65 kDa phosphoprotein	151	170	ASGKQMWQARLTVSGLAWTR	20
YP_009724390.166	182	S protein	906	920	FNGIGVTQNVLYENQ	15										Q6SW59	182	65 kDa phosphoprotein	116	135	LPLKMLNIPSINVHHYPSAA	20
YP_009724390.167	183	S protein	911	925	VTQNVLYENQKLIAN	15										Q6SW59	183	65 kDa phosphoprotein	36	55	PHETRLLQTGIHVRVSQPSL	20
YP_009724390.168	184	S protein	916	930	LYENQKLIANQFNSA	15										Q6SW59	184	65 kDa phosphoprotein	111	130	IYVYALPLKMLNIPSINVHH	20
YP_009724390.169	185	S protein	921	935	KLIANQFNSAIGKIQ	15										Q6SW59	185	65 kDa phosphoprotein	341	360	QYDPVAALFFFDIDLLLQRG	20
YP_009724390.170	186	S protein	926	940	QFNSAIGKIQDSLSS	15										Q6SW59	186	65 kDa phosphoprotein	201	220	AHELVCSMENTRATKMQVIG	20
YP_009724390.171	187	S protein	931	945	IGKIQDSLSSTASAL	15										Q6SW59	187	65 kDa phosphoprotein	231	250	FCEDVPSGKLFMHVTLGSDV	20
YP_009724390.172	188	S protein	936	950	DSLSSTASALGKLQD	15
YP_009724390.173	189	S protein	941	955	TASALGKLQDVVNQN	15
YP_009724390.174	190	S protein	946	960	GKLQDVVNQNAQALN	15
YP_009724390.175	191	S protein	951	965	VVNQNAQALNTLVKQ	15
YP_009724390.176	192	S protein	956	970	AQALNTLVKQLSSNF	15
YP_009724390.177	193	S protein	961	975	TLVKQLSSNFGAISS	15
YP_009724390.178	194	S protein	966	980	LSSNFGAISSVLNDI	15
YP_009724390.179	195	S protein	971	985	GAISSVLNDILSRLD	15
YP_009724390.180	196	S protein	976	990	VLNDILSRLDKVEAE	15
YP_009724390.181	197	S protein	981	995	LSRLDKVEAEVQIDR	15
YP_009724390.182	198	S protein	986	1000	KVEAEVQIDRLITGR	15
YP_009724390.183	199	S protein	991	1005	VQIDRLITGRLQSLQ	15
YP_009724390.184	200	S protein	996	1010	LITGRLQSLQTYVTQ	15
YP_009724390.185	201	S protein	1001	1015	LQSLQTYVTQQLIRA	15
YP_009724390.186	202	S protein	1006	1020	TYVTQQLIRAAEIRA	15
YP_009724390.187	203	S protein	1011	1025	QLIRAAEIRASANLA	15
YP_009724390.188	204	S protein	1016	1030	AEIRASANLAATKMS	15
YP_009724390.189	205	S protein	1021	1035	SANLAATKMSECVLG	15
YP_009724390.190	206	S protein	1026	1040	ATKMSECVLGQSKRV	15
YP_009724390.191	207	S protein	1031	1045	ECVLGQSKRVDFCGK	15
YP_009724390.192	208	S protein	1036	1050	QSKRVDFCGKGYHLM	15
YP_009724390.193	209	S protein	1041	1055	DFCGKGYHLMSFPQS	15
YP_009724390.194	210	S protein	1046	1060	GYHLMSFPQSAPHGV	15
YP_009724390.195	211	S protein	1051	1065	SFPQSAPHGVVFLHV	15
YP_009724390.196	212	S protein	1056	1070	APHGVVFLHVTYVPA	15
YP_009724390.197	213	S protein	1061	1075	VFLHVTYVPAQEKNF	15
YP_009724390.198	214	S protein	1066	1080	TYVPAQEKNFTTAPA	15
YP_009724390.199	215	S protein	1071	1085	QEKNFTTAPAICHDG	15
YP_009724390.200	216	S protein	1076	1090	TTAPAICHDGKAHFP	15
YP_009724390.201	217	S protein	1081	1095	ICHDGKAHFPREGVF	15
YP_009724390.202	218	S protein	1086	1100	KAHFPREGVFVSNGT	15
YP_009724390.203	219	S protein	1091	1105	REGVFVSNGTHWFVT	15
YP_009724390.204	220	S protein	1096	1110	VSNGTHWFVTQRNFY	15
YP_009724390.205	221	S protein	1101	1115	HWFVTQRNFYEPQII	15
YP_009724390.206	222	S protein	1106	1120	QRNFYEPQIITTDNT	15
YP_009724390.207	223	S protein	1111	1125	EPQIITTDNTFVSGN	15
YP_009724390.208	224	S protein	1116	1130	TTDNTFVSGNCDVVI	15
YP_009724390.209	225	S protein	1121	1135	FVSGNCDVVIGIVNN	15
YP_009724390.210	226	S protein	1126	1140	CDVVIGIVNNTVYDP	15
YP_009724390.211	227	S protein	1131	1145	GIVNNTVYDPLQPEL	15
YP_009724390.212	228	S protein	1136	1150	TVYDPLQPELDSFKE	15
YP_009724390.213	229	S protein	1141	1155	LQPELDSFKEELDKY	15
YP_009724390.214	230	S protein	1146	1160	DSFKEELDKYFKNHT	15
YP_009724390.215	231	S protein	1151	1165	ELDKYFKNHTSPDVD	15
YP_009724390.216	232	S protein	1156	1170	FKNHTSPDVDLGDIS	15
YP_009724390.217	233	S protein	1161	1175	SPDVDLGDISGINAS	15
YP_009724390.218	234	S protein	1166	1180	LGDISGINASVVNIQ	15
YP_009724390.219	235	S protein	1171	1185	GINASVVNIQKEIDR	15
YP_009724390.220	236	S protein	1176	1190	VVNIQKEIDRLNEVA	15
YP_009724390.221	237	S protein	1181	1195	KEIDRLNEVAKNLNE	15
YP_009724390.222	238	S protein	1186	1200	LNEVAKNLNESLIDL	15
YP_009724390.223	239	S protein	1191	1205	KNLNESLIDLQELGK	15
YP_009724390.224	240	S protein	1196	1210	SLIDLQELGKYEQYI	15
YP_009724390.225	241	S protein	1201	1215	QELGKYEQYIKWPWY	15
YP_009724390.226	242	S protein	1206	1220	YEQYIKWPWYIWLGF	15
YP_009724390.227	243	S protein	1211	1225	KWPWYIWLGFIAGLI	15
YP_009724390.228	244	S protein	1216	1230	IWLGFIAGLIAIVMV	15
YP_009724390.229	245	S protein	1221	1235	IAGLIAIVMVTIMLC	15
YP_009724390.230	246	S protein	1226	1240	AIVMVTIMLCCMTSC	15
YP_009724390.231	247	S protein	1231	1245	TIMLCCMTSCCSCLK	15
YP_009724390.232	248	S protein	1236	1250	CMTSCCSCLKGCCSC	15
YP_009724390.233	249	S protein	1241	1255	CSCLKGCCSCGSCCK	15
YP_009724390.234	250	S protein	1246	1260	GCCSCGSCCKFDEDD	15
YP_009724390.235	251	S protein	1251	1265	GSCCKFDEDDSEPVL	15
YP_009724390.236	252	S protein	1256	1270	FDEDDSEPVLKGVKL	15
YP_009724390.237	253	S protein	1259	1273	DDSEPVLKGVKLHYT	15
